# Supplementary material for: On estimating the time to statistical cure
Source: PubMed Central journal article supplement (PMC7098130; doi:10.1186/s12874-020-00946-8), 2020-03-26

## Appendix A: Variance of the cure point estimator

In the following, we derive a variance estimator for the cure point estimator using the delta method under the assumption that the hazard function  $h(t, \boldsymbol{\theta})$  has a parametric form with parameters  $\boldsymbol{\theta}$ . Denote the parameter estimate by  $\hat{\boldsymbol{\theta}}$ , and assume that  $\sqrt{n}(\hat{\boldsymbol{\theta}} - \boldsymbol{\theta}_0)$  is asymptotically normal with mean  $\mathbf{0}$  and variance  $\Sigma$ , where  $\boldsymbol{\theta}_0$  is the true parameter value and  $\Sigma$  is the inverse information matrix, i.e., minus the inverse of the expected Hessian matrix of the likelihood function evaluated at  $\boldsymbol{\theta}_0$ .

Let  $G(t, \boldsymbol{\theta}) = G(h, h^*)(t)$  be the strictly monotone comparison measure at time  $t$  obtained by inserting the parameters of the hazard function into the comparison measure and assume that  $G$  is continuously differentiable with respect to  $\boldsymbol{\theta}$  and  $t$ . Furthermore, let  $t_\epsilon = G^{-1}(\epsilon, \boldsymbol{\theta})$  and  $\hat{t}_\epsilon = G^{-1}(\epsilon, \hat{\boldsymbol{\theta}})$  for a fixed clinical relevant margin,  $\epsilon$ . The variance of  $\hat{t}_\epsilon$  can then be approximated directly by using the the delta method, i.e.,

$$\text{Var} [\hat{t}_\epsilon] \approx \frac{1}{n} (\nabla_{\boldsymbol{\theta}} t_\epsilon |_{\boldsymbol{\theta}=\hat{\boldsymbol{\theta}}}) \Sigma (\nabla_{\boldsymbol{\theta}} t_\epsilon |_{\boldsymbol{\theta}=\hat{\boldsymbol{\theta}}})^T. \quad (1)$$

Due to the definition of  $t_\epsilon$ ,

$$\nabla_{\boldsymbol{\theta}} G(t_\epsilon, \boldsymbol{\theta}) |_{\boldsymbol{\theta}=\hat{\boldsymbol{\theta}}} = \mathbf{0}, \quad (2)$$

and by the chain rule of vector functions we have that

$$\nabla_{\boldsymbol{\theta}} G(t_\epsilon, \boldsymbol{\theta}) |_{\boldsymbol{\theta}=\hat{\boldsymbol{\theta}}} = \frac{\partial G(t, \boldsymbol{\theta})}{\partial t} \Big|_{t=\hat{t}_\epsilon, \boldsymbol{\theta}=\hat{\boldsymbol{\theta}}} \nabla_{\boldsymbol{\theta}} t_\epsilon |_{\boldsymbol{\theta}=\hat{\boldsymbol{\theta}}} + \nabla_{\boldsymbol{\theta}} G(t, \boldsymbol{\theta}) \Big|_{t=\hat{t}_\epsilon, \boldsymbol{\theta}=\hat{\boldsymbol{\theta}}}.$$

Thus,

$$\nabla_{\boldsymbol{\theta}} t_\epsilon |_{\boldsymbol{\theta}=\hat{\boldsymbol{\theta}}} = - \left( \frac{\partial G(t, \boldsymbol{\theta})}{\partial t} \Big|_{t=\hat{t}_\epsilon, \boldsymbol{\theta}=\hat{\boldsymbol{\theta}}} \right)^{-1} \nabla_{\boldsymbol{\theta}} G(t, \boldsymbol{\theta}) \Big|_{t=\hat{t}_\epsilon, \boldsymbol{\theta}=\hat{\boldsymbol{\theta}}}. \quad (3)$$

Inserting into (1) yields

$$\text{Var} [\hat{t}_\epsilon] \approx \frac{1}{n} \left( \frac{\partial G(t, \boldsymbol{\theta})}{\partial t} \Big|_{t=\hat{t}_\epsilon, \boldsymbol{\theta}=\hat{\boldsymbol{\theta}}} \right)^{-2} \left( \nabla_{\boldsymbol{\theta}} G(t, \boldsymbol{\theta}) \Big|_{t=\hat{t}_\epsilon, \boldsymbol{\theta}=\hat{\boldsymbol{\theta}}} \right) \Sigma \left( \nabla_{\boldsymbol{\theta}} G(t, \boldsymbol{\theta}) \Big|_{t=\hat{t}_\epsilon, \boldsymbol{\theta}=\hat{\boldsymbol{\theta}}} \right)^T \quad (4)$$

$$\approx \left( \frac{\partial G(t, \boldsymbol{\theta})}{\partial t} \Big|_{t=\hat{t}_\epsilon, \boldsymbol{\theta}=\hat{\boldsymbol{\theta}}} \right)^{-2} \text{Var} [G(t, \hat{\boldsymbol{\theta}})] \Big|_{t=\hat{t}_\epsilon}, \quad (5)$$

where  $\text{Var} [G(t, \hat{\boldsymbol{\theta}})] \Big|_{t=\hat{t}_\epsilon}$  is the variance of  $G(\hat{t}_\epsilon, \hat{\boldsymbol{\theta}})$  without taking into account the uncertainty of  $\hat{t}_\epsilon$ , i.e., the point-wise variance of  $G$  evaluated at the point  $\hat{t}_\epsilon$ . For obtaining a non-negative confidence interval for the cure point,  $\hat{t}_\epsilon$ , the variance of the log-transformed estimator is computed by the delta method:

$$\text{Var} [\log(\hat{t}_\epsilon)] \approx \frac{1}{\hat{t}_\epsilon^2} \text{Var} [\hat{t}_\epsilon] \approx \frac{1}{\hat{t}_\epsilon^2} \left( \frac{\partial G(t, \boldsymbol{\theta})}{\partial t} \Big|_{t=\hat{t}_\epsilon, \boldsymbol{\theta}=\hat{\boldsymbol{\theta}}} \right)^{-2} \text{Var} [G(t, \hat{\boldsymbol{\theta}})] \Big|_{t=\hat{t}_\epsilon}. \quad (6)$$

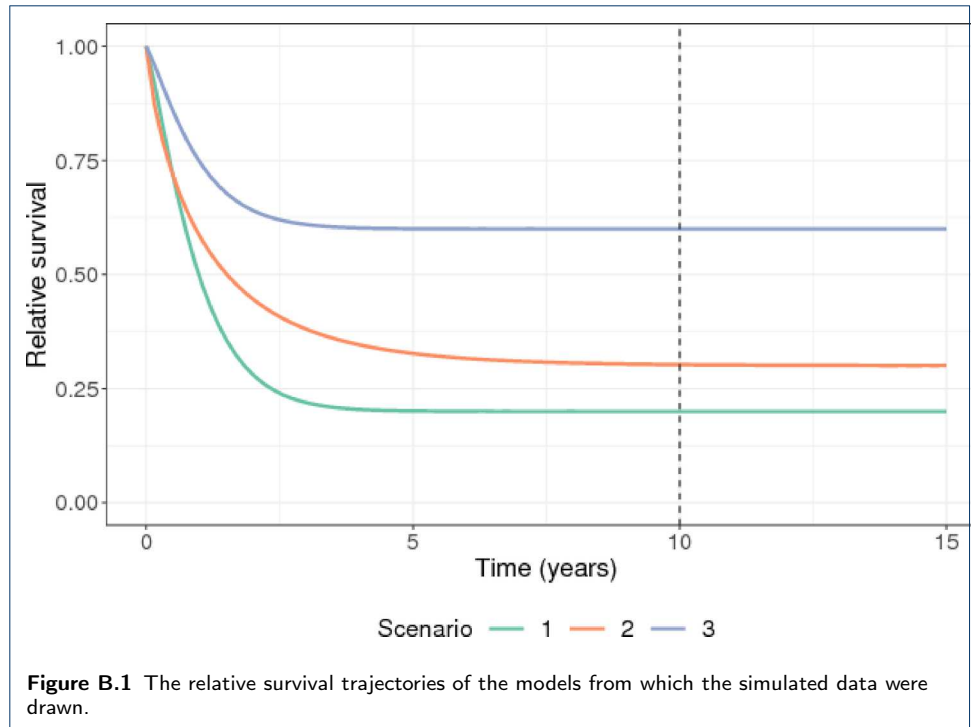

## Appendix B: Additional figures and tables

Data were simulated from a Weibull mixture cure model, formulated by

$$R(t) = \pi + (1 - \pi)\exp(-\gamma_2 t^{\gamma_1}), \quad (7)$$

with parameter values displayed in Table B.1.

| Scenario | $\pi$ | $\gamma_1$ | $\gamma_2$ |
|----------|-------|------------|------------|
| 1        | 0.2   | 1.2        | 1          |
| 2        | 0.3   | 0.8        | 0.9        |
| 3        | 0.6   | 1.2        | 1          |

**Table B.1** Parameter values used for simulating survival data.

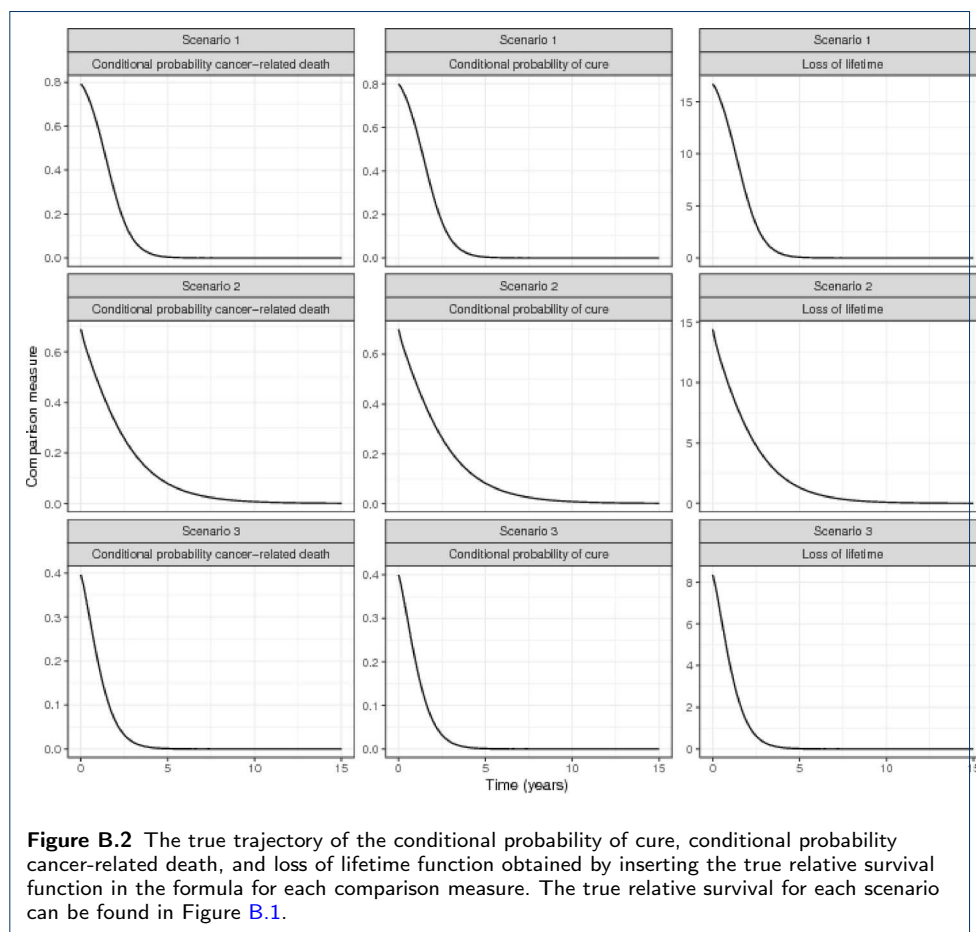

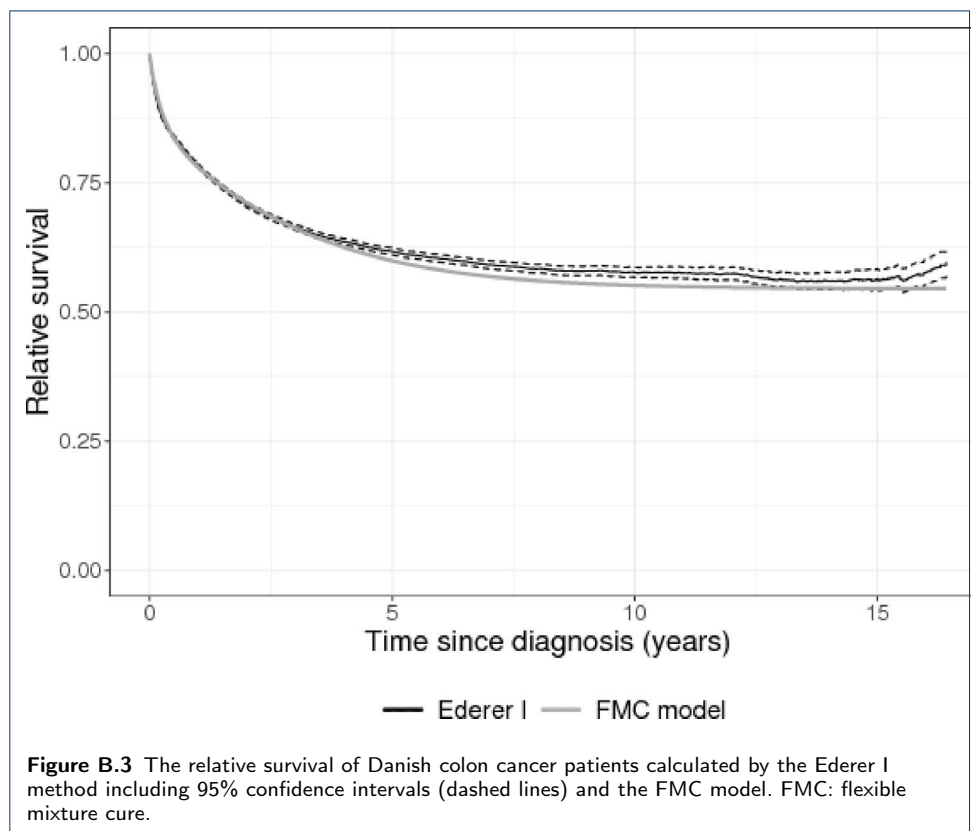

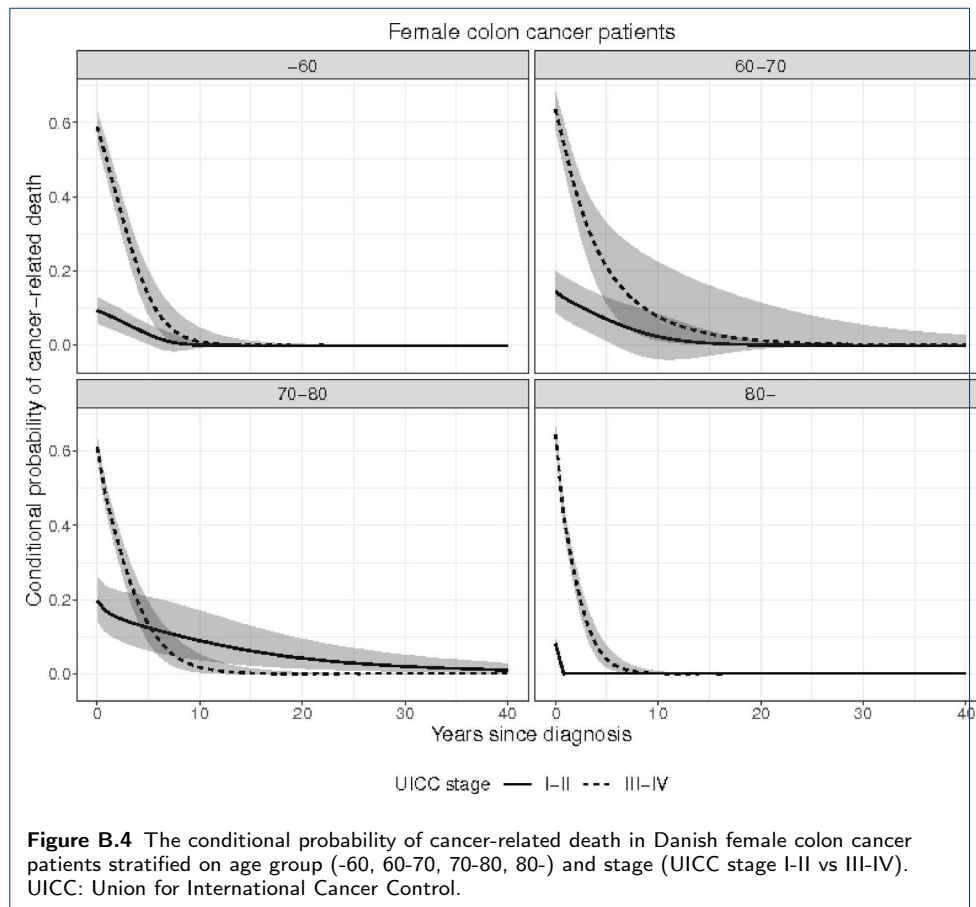

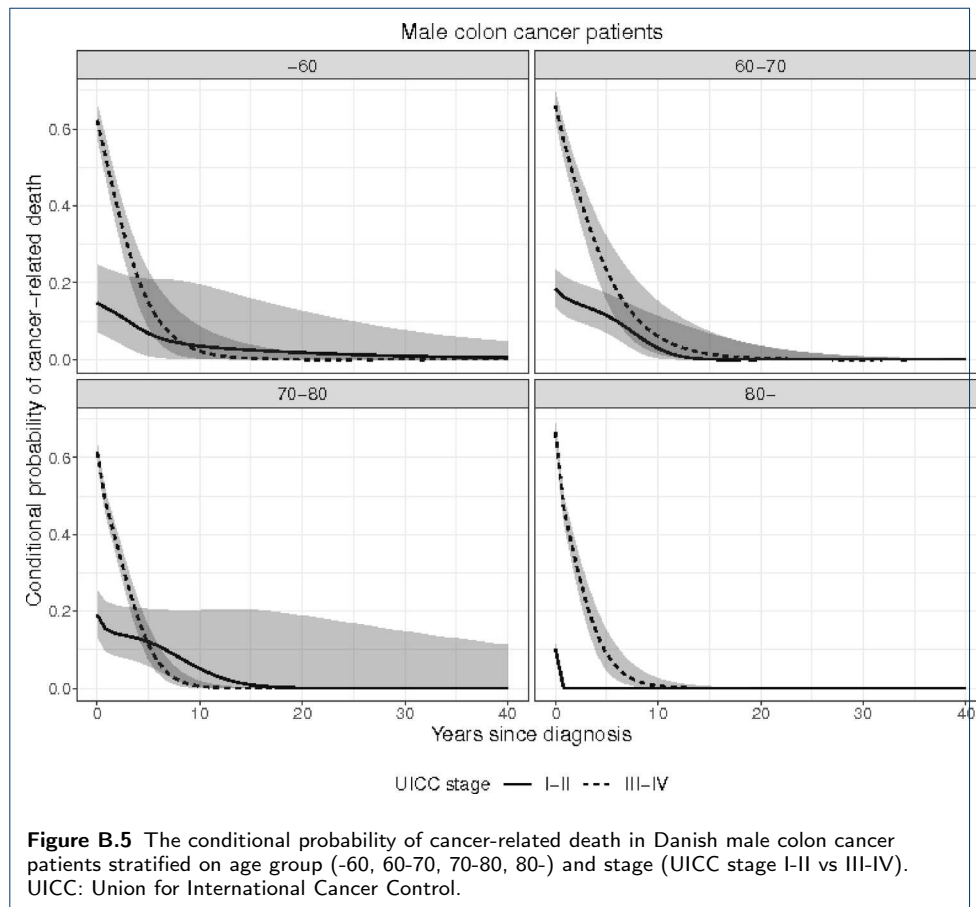

Supplement: 12874_2020_946_MOESM1_ESM.pdf [file 12874_2020_946_MOESM1_ESM.pdf]
